# Supplementary material for: Update on the Transmission of Zika Virus Through Breast Milk and Breastfeeding: A Systematic Review of the Evidence
Source: Preprints.org preprint supplement (doi:10.20944/preprints202012.0188.v1), 2020-12-08
Supplement: Supplementary file 1 [file supplementary]

Archive with 3 entries (3 files):
- S1-PRISMA checklist.pdf
- S1-Search strategy overview.docx
- S1-Summary table.xlsx
