# Supplementary material for: Update on the Transmission of Zika Virus Through Breast Milk and Breastfeeding: A Systematic Review of the Evidence
Source: Preprints.org preprint supplement (doi:10.20944/preprints202012.0188.v1), 2020-12-08
Supplement: Supplementary file 1 [file supplementary › S1-Summary table.xlsx]

## Sheet: Summary table
Update on the transmission of Zika virus through breast milk and breastfeeding: A systematic review of the evidence
				Children outcomes										Breast milk outcomes					Maternal outcomes
Study	Design	Country	Participants	Children with ZIKV infection	Blood RT-PCR	Blood ELISA	Saliva RT-PCR	Urine RT-PCR	Infants age at study	Breasted	Infant feeding practices described	Abnormalities at birth	Mortality	Breast milk, viral RNA detected?	RT-PCR	Culture	Viral RNA sequencing	Time after suspected exposure	Mother with confirmed ZIKV infection	Gestational/postpartum time at diagnosis	Maternal clinical symptoms	Maternal clinical stage	Blood RT-PCR	Blood ELISA	Urine RT-PCR	Culture	Viral RNA sequencing	Time from symptoms onset to diagnosis	Differential diagnosis
Besnard 2014 Besnard 2017	Case reports	French Polynesia	Mother and child pair 1	Yes	Positive	NA	Positive	NA	3 days	Yes	Breastfed since birth	No	No	Yes	Positive	Negative	NA	6 days after maternal symptoms onset	Yes	38 gestational week	Mild pruritic rash, no fever	Acute	Positive, 5 days after symptoms onset in blood and saliva	NA	NA	NA	NA	4 days after maternal symptoms onset	Not reported
			Mother and child pair 2	Yes	Positive	NA	NA	NA	4 days	Yes, breastmilk and formula	Not clear	Yes, severe hypotrophy and Apgar score 8/9/9, hypoglycaemia, neonatal jaundice	No	Yes	Positive	Negative	NA	2 days after maternal symptoms onset	Yes	3 days postpartum	Mild fever, pruritic rash and myalgia	Acute	Positive, 2 days after symptoms onset	NA	Positive, 3 days after maternal symptoms onset	NA	NA	0	Not reported, the women was followed for gestational diabetes
Dupont 2016	Case report	New Caledonia, France	Mother and child pair 1	Undetermined	Ambiguos	NA	NA	NA	4 days	Yes	Breastfed since birth	No	No	Yes	Positive	Positive	NA	4 days after maternal symptoms onset	Yes	3 days postpartum	Fever and macupapular rash	Acute	Positive 3 days after symptoms onset	NA	NA	NA	NA	Day 3 of maternal symptoms onset	Mother and neonate blood samples were negative for dengue virus, and chikungunya virus by RT-qPCR.
Blohm 2017 Blohm 2018	Case report	Venezuela	1 mother and child pair	Yes	Plasma positive	NA	NA	Positive	5 months	Yes, including during maternal symptomatic phase	Breastfed for 5 months	No	No	Yes	Positive	Positive	99% identity with virus isolated from the child's urine	5 days after maternal symptoms onset	Yes	5 months postpartum	Malaise, arthralgia, conjunctival hyperemia, and pruritic maculopapular rash	Acute	Plasma negative 5 days after symptoms onset	Positive for IgM and marginal IgG	Positive	NA	NA	5 days after symptoms onset	No antiboides for CHIKV. Dengue IgG positive and IgM negative. Negative for parvovirus, cytomegalovirus, Epstein-Barr virus, varicella zoster virus, and herpes simplex virus types 1 and 2
Cavalcanti 2017	Case reports	Brazil	4 mother and child pairs	No	Serum, negative	NA	NA	NA	11 months	Yes	"breastfeeding was avoided for 7 days after symptoms onset and restarted 4 days after rash had ended"	No	No	Yes	Positive	Positive	NA	Positive sample at day 4 of maternal symptoms onset	Yes	11 months post partum	Malaise, fever, macupapular rash on face, trunk, arms, exanthema spreaded to legs	Acute	Serum, positive	NA	Positive	NA	NA	Plasma at day 3 of maternal symptoms onset Urine at 10 of maternal symptoms onset	NA
				No	NA	NA	NA	NA	2-3 months	Yes	Breastfed for 2-3 months	No	No	No	Negative	NA	NA	5 days of maternal symptoms onset	Yes	2-3 months postpartum	Fever, retro-ocular pain, and conjunctival hyperemia, macupapular rasj, arthralgia, articular edema of fingers and toes	Acute	Serum, negative	NA	Positive	NA	NA	5 days of symptoms onset	NA
				No	Serum, Negative for ZIKV Serum, Positive for CHIKV	NA	NA	NA	10-11 months	Yes	Breastfed for 10-11 months	No	No	No	Negative	NA	NA	9 days after maternal symptoms onset	Yes	4 gestational weeks of pregnancy and 10-11 months postpartum	Fever, rash, conjunctival hyperemia severe arthralgia of the shoulders, wrists, and ankles. After 2–3 days, exanthema and arthralgia relapse	Acute	Serum, positive	NA	Positive	NA	NA	Serum at day 7 of symptom onset Urine at day 9 of symptoms onset	NA
				No	Serum, negative	IgM negative IgG not reported	NA	Negative	0-4 months	Yes	4 months, since birth (maternal infection was at the 28th gestational week)	No	No	No	Negative	NA	NA	4 months postpartum, exposure occurred at 28th gestational week	Yes	28 gestational week	Mild arthralgia of the left ankle and both knees without arthritis or edema had followed a diffuse pruritic maculopapular rash without fever	Acute	Serum, positive	NA	Positive	NA	NA	Serum at day 5 of symptom onset Urine at day 30 of symptoms onset Serum and urine were negative during the first 4 months postpartum	NA
Sotelo 2017	Case report	Brazil	1 mother and child pair	Yes	Chord blood, negative	NA	NA	Positive	0, samples were assessed at birth	No	Not reported	No	No	Yes	Positive for sample at 37th gestational week and at birth, 38 th gestational week, and 10th weeks postpartum	Positive for colostrum and sample 10 days after birth	NA	Colostrum sample, 15 days after symptoms onset at 37th gestational week, before delivery	Yes	36 gestational week	Fever, rash, myalgia, and joint pain in the hands and wrists	Acute	Positive	IgM and IgG positive	Positive	NA	NA	Blood by RT-PCR at day 1 of symptoms onset Blood by ELISA 9 days after symptoms onset Urine by RT-PCR 9 days after symptoms onset	RT-PCR was negative for chikungunya virus
Giovanetti 2018	Case report	Brazil	1 mother and child pair (Intra-utero exposure)	Yes	Serum, positive	NA	NA	Positive	0, samples were assessed at birth	No	Not reported	Yes, A craniofacial disproportion, abnormal skull morphology with a sloping forehead and a defect of the left upper limb with ring constriction and residual nubbins were observed, indicating the presence of a possible amniotic band syndrome lesion	No	Yes	Positive	NA	Positive for strain similarities found with newborn viral genome sequencing obtained from the newborn	29 weeks approximately. Exposure occurred at 9th gestational weeks and the breastmilk sample was analyzed 2 days postpartum, delivery occurred at 38th gestational weeks.	Yes	9th gestational week	Diffuse pruritic cutaneous rash and joint pain	Acute	Not reported at 9th gestational week, symptomatic phase Negative at delivery, 38th gestational week	IgM positive. IgG not reported	NA	NA	NA	Exact time between symptoms and test was not reported	Toxoplasmosis, herpesvirus 1 and 2, dengue and chikungunya viruses were negative. IgM ELISA was negative for rubella and cytomegalovirus
Desclaux 2018	Case report	France	1 mother and child pair	No	Negative (serum)	NA	NA	NA	0, borned at 39th week of pregnancy	Not reported	Not reported	No fetal or placental anomalies were observed on ultrasonographic imaging performed at 16, 19, 22, 26, and 33 weeks of gestation. A comprehensive physical examination performed when the infant was 3 months of age did not reveal any neurodevelopmental anomalies or adverse events.	No	No	Negative	NA	NA	Maternal diagnosis was at 15 gw while breat milk test was done at delivery at 39 gw.	Yes	15 gestational week	Headache, conjunctivitis	Acute at diagnosis, but not at delivery or at the time the breast milk sample was tested	Positive (plasma)	NA	Positive	NA	NA	Exact time between symptoms and test was not reported	Repeated serologic testing for IgM and IgG to dengue and chikungunya virus was negative.
Mello 2018	Case report	Brazil	1 mother and child pair	No	Negative	Negative	Negative	Negative	At birth follow-up to 7 months	Yes	Exclusively breastfed since birth	Not at birth but secondary microcephaly diagnosed at 23 days old. At 7 months 29 days continued with reduced head gworth and showed a weight of 8.1 kg; length 68.5 cm and head circumference 40.5 cm, with z scores of 0.20; –0.02; –2.10, respectively	No	Yes	Positive	NA	NA	Not clear	No, but positive breast milk sample	At birth, 39 gestational week	No symptoms	Not clear	Negative	Negative	NA	NA	NA	No symptoms	Both mother and baby were negative by STORCH (acronym for disease group comprising syphilis, toxoplasmosis, other infections, rubella, cytomegalovirus infection, and herpes simplex). Other possible causes of microcephaly such as abnormal ventricles, craniosynostosis, congenital hypothyroidism, were excluded.
Villamil-Gomez 2017	Case report	Colombia	1 mother-child pair	Yes	Positive (serum) at birth and 4, 6 months	NA	NA	NA	at birth and follow-up to 6 months	Not reported	Not reported	Miicrocephaly, ventriculomegaly, basal ganglia and bilateral subcortical calcifications. EEG was slightly altered, with inadequate modulation. Ophthalmological assessment was normal. Neurological examination found generalized hypertony. After six months, neurological findings persisted, head circumference at born was 30 cms (< −3SD), at 4th month 34 cms (< −3SD) and 6 months later 35 cms (< −3SD)…	No	Yes	Positive	NA	NA	30 weeks	Yes	8 gestational week	Fever and chills, with no rash, pruritus and arthralgias	Convalescent	Positive (serum) at birth and 4, 6 months	NA	Positive	NA	NA	30 weeks	Tests for Dengue and Chikungunya viruses were negative
Hemachudha 2019	Case report	Thailand	1 mother and child pair	No	NA	Negative	NA	Negative (all 7 samples)	10 months	Yes	Exclsuive breastfeeding until maternal serum and breast milk were positive for ZIKV RNA. Breast milk samples had detectable levels of ZIKV RNA for 11 days before stopping breastfeeding	No	No	Yes	Positive, starting 3 days before maternal symptoms and remained positive for 11 days (22 samples total).	NA	NA	Samples were positive 3 days before maternal symptoms onset. The mother routinely stored expressed breast milk which allowed for the analysis.	Yes	Aproximately 10 months postpartum	Low-grade fever and fatigue, followed by morbilliform itchy red rash, bilateral orbital pain, and submandibular lymphadenopathy, bilateral conjunctivitis and polyarthralgia	Acute	Positive (serum)	IgG positive and IgM negative	Positive	NA	NA	5 days	NA
Longitudinal studies
Buathong 2017 (Abstract only)	Cohort	Thailand	6 out of 27 women were positive for ZIKV in breastmilk	No, 9 from confirmed cases and 62 from probable cases	Negative	Negative	NA	Negative	0-3 days	Yes	Weaned while breastmilk was positive for ZIKV	No	No	Yes (6), No (21)	Positive	NA	Asian lineage identified	1-2 weeks after diagnosis	Yes, all 6 women	Not clear, abstract only	64% symptomatic but symptoms were not reported	Not clear, presumably acute	Positive (method unclear)	NA	NA	NA	NA	Not reported but the 6 positive women postpartum were reportedly infected during 36-39 gestational weeks	Not reported
Rodo 2019	Prospective cohort	Spain	254 pregnant women tested for ZIKV infection as part of cross-sectional analysis. 72 positive women followed up prospectively, 9 positive by RT-PCR and 62 positive for IgM or IgG	NA	Negative (serum)	The infant born with brain abnormalities had elevated IgG for 24 months after birth	NA	At birth	NA	Not reported	Not reported	Among the 9 cases with positive maternal RT-PCR tests, there was one spontaneous abortion, one elective termination of pregnancy due to fetal abnormalities. One baby was born with brain malformations. The remaining cases were healthy	Of the zika positive group one spontaneous abortion and one elective termination were recorded.	No, among 15 cases tested	Negative	NA	NA	Not clear	72 of 254 women were positive	72 of 254 women were positive	23 women reported symptoms that include rash 21 (84%), fever 15 (65.2%), artharlgia 12 (60%), conjunctival hyperaemia 4 (20%)	23 acute cases	Positive, 9 cases	62/71, 87.3%, tested positive for ZIKV IgM and/or ZIKV IgG and positive. 4 cases had postive IgM, 3 cases had positive both IgM and RT-PCR tests. 9 cases had detectable IgG levels.	Positive, 3 cases who were also positive for serum RNA levels	NA	NA	NA	All women tested negative for Toxoplasma gondii, Rubella virus, Hepatitis B and C viruses, syphilis, and HIV. Additionally, 48 cases tested for DENV antibodies: 2 with high IgM levels, 47 with IgG and 1 case with negative IgM/IgG.
deQuental 2019	Prospective Cohort	Brazil	40 puerperal donors of colostrum (20 infected with Zika and 20 not infected)	No	NA	NA	NA	NA	NA	Not reported	Not reported	Babies from both groups had no changes in the head circumference and there were no cases of microcephaly. Six women from the Zika group reported the development of infant health complications (convulsion (1), neuropsychomotor development delay (2), and hearing (2) and vision (1) impairment)	NA	No, all 20 mothers from the Zika group.	Negative	NA	NA	ZIKV infection occurred mostly within the first three months of gestation	Yes, 20 women were infected	Yes, 20 women were infected	All mothers from the Zika group are reported to have symptoms but they are not specified.	Convalescent (at the time of breast milk collection)	Positive (20 cases)	NA	NA	NA	NA	NA	NA
Tozetto-Mendoza 2019	Cohort	Brazil	235 symptomatic patients, (161 were women , 18 whom were pregnant, and at least one nursing mother)	No	Negative (cord blood)	NA	Negative	At birth	NA	Not reported	Not reported	NA	NA	Yes (1/3 samples)	Positive	Positive	NA	Not clear, symptoms started at 36 weeks of gestation	Yes, 1	Yes, 1	Among Zika postive cases: Fever (40), rash (89), pruritus (61), petechiae (8), bleeding (8), conjunctivitis (9), arthralgia (62), articular edema (25), headache (56), weakness (16), myalgia (40), sore throat/cough (27), and gastrointestinal symptoms (33)	Convalescent (20 and 23 days after symptom onset)	Positive (94/235 had confirmed ZIKV infection by RT-PCR in either plasma, serum or urine samples). At leas 7 positive cases were pregnant women.		Positive (94/235 had confirmed ZIKV infection by RT-PCR in either plasma)	NA	NA	At the time of enrollment, the median time since symptoms onset was 3 days (IQR, 1-4) for ZIKV-positive participants. One nursing mother who had ZIKV symptoms onset at week 36 of gestation provided breast milk samples 20, 23 and 30 days after symptoms onset.	Some individuals were also tested for CHIKV/DENV but is all aggregated data.
